# Supplementary material
Source: Springer Nature journal article supplement (https://www.springermedizin.de/resource/supplementary/12882_2013_754_MOESM1_ESM.pdf/9454646)
Supplement: MOESM1 [file 9454646]

## Additional File

**Supplementary table 1. Serum uric acid and eGFR pre-/post-treatment 1 year**

|                   | PreTx_12m<br>o | preTx_9mo   | preTx_6mo   | preTx_3mo   | Initiation  | postTx_3m<br>o | postTx_6m<br>o | postTx_9m<br>o | postTx_12<br>mo |
|-------------------|----------------|-------------|-------------|-------------|-------------|----------------|----------------|----------------|-----------------|
| Total (n)         | 53             | 48          | 49          | 46          | 53          | 52             | 51             | 51             | 53              |
| SUA               | 7.9 ± 1.1      | 7.7 ± 1.0   | 7.6 ± 1.0   | 8.1 ± 1.1   | 8.7 ± 0.8   | 6.3 ± 1.2      | 6.3 ± 1.3      | 6.2 ± 1.4      | 6.2 ± 1.4       |
| eGFR              | 53.2 ± 20.3    | 52.7 ± 19.3 | 49.1 ± 17.1 | 47.9 ± 18.9 | 47.9 ± 20.3 | 49.3 ± 22.9    | 46.8 ± 20.8    | 46.8 ± 22.4    | 48.1 ± 22.9     |
| Stage 1-3a<br>(n) | 32             | 29          | 28          | 25          | 32          | 31             | 30             | 30             | 32              |
| SUA               | 8.1 ± 1.2      | 7.6 ± 1.0   | 7.5 ± 1.1   | 8.0 ± 1.1   | 8.7 ± 0.9   | 6.0 ± 1.3      | 5.9 ± 1.3      | 5.9 ± 1.4      | 5.7 ± 1.4       |
| eGFR              | 64.8 ± 16.3    | 64.8 ± 14.0 | 61.0 ± 9.7  | 61.3 ± 12.9 | 60.3 ± 16.1 | 62.9 ± 19.0    | 60.3 ± 15.1    | 61.0 ± 17.3    | 62.6 ± 16.4     |
| Stage 3b-4<br>(n) | 21             | 19          | 21          | 21          | 21          | 21             | 21             | 21             | 21              |
| SUA               | 7.6 ± 1.0      | 7.8 ± 1.0   | 7.9 ± 0.89  | 8.1 ± 1.0   | 8.8 ± 0.6   | 6.8 ± 0.9      | 6.9 ± 1.2      | 6.7 ± 1.2      | 7.0 ± 0.9       |
| eGFR              | 35.6 ± 10.9    | 35.0 ± 10.0 | 33.1 ± 10.2 | 32.0 ± 10.6 | 29.1 ± 7.2  | 29.1 ± 9.0     | 27.5 ± 9.3     | 26.4 ± 9.2     | 26.0 ± 10.0     |

Tx, treatment; mo, month

**Supplementary table 2. Average systolic, diastolic, and mean blood pressure at 1 year pre- and post-treatment**

|     | Pre-treatment* | Post-treatment* | p-value<br>(paired-t) |
|-----|----------------|-----------------|-----------------------|
| SBP | 132.4 ± 10.6   | 128.8 ± 8.6     | 0.006                 |
| DBP | 83.3 ± 7.9     | 80.1 ± 6.5      | 0.077                 |
| MBP | 99.7 ± 8.4     | 96.3 ± 6.8      | 0.012                 |

\*The average blood pressure measured every 3 months during 1 year of pre- and post-treatment, respectively

**Supplementary Figure 1. Immunohistochemical staining of URAT1, GLUT9, NPT4 and OAT3**

Expression of several urate transporters, reabsorption (URAT1, GLUT9) and excretion (NPT4, OAT3), are shown (x40 and x200 (inlet)). Uric acid transporters were strongly stained in proximal tubular epithelial cells in ADPKD tissue. All the transporters except URAT1 are also expressed in some of the cyst-lining epithelial cells. ADPKD; autosomal dominant polycystic kidney disease.
